# Supplementary material for: Simulated annealing reveals the kinetic activity of SGLT1, a member of the LeuT structural family
Source: PubMed Central journal article supplement — J Gen Physiol. 2012 Oct;140(4):361–74. doi: 10.1085/jgp.201210822 (PMC3457693; doi:10.1085/jgp.201210822), 2012-10
Supplement: supp_jgp.201210822_JGP_201210822_sm.pdf [file supp_jgp.201210822_JGP_201210822_sm.pdf]

Longpré et al., <http://www.jgp.org/cgi/content/full/jgp.201210822/DC1>

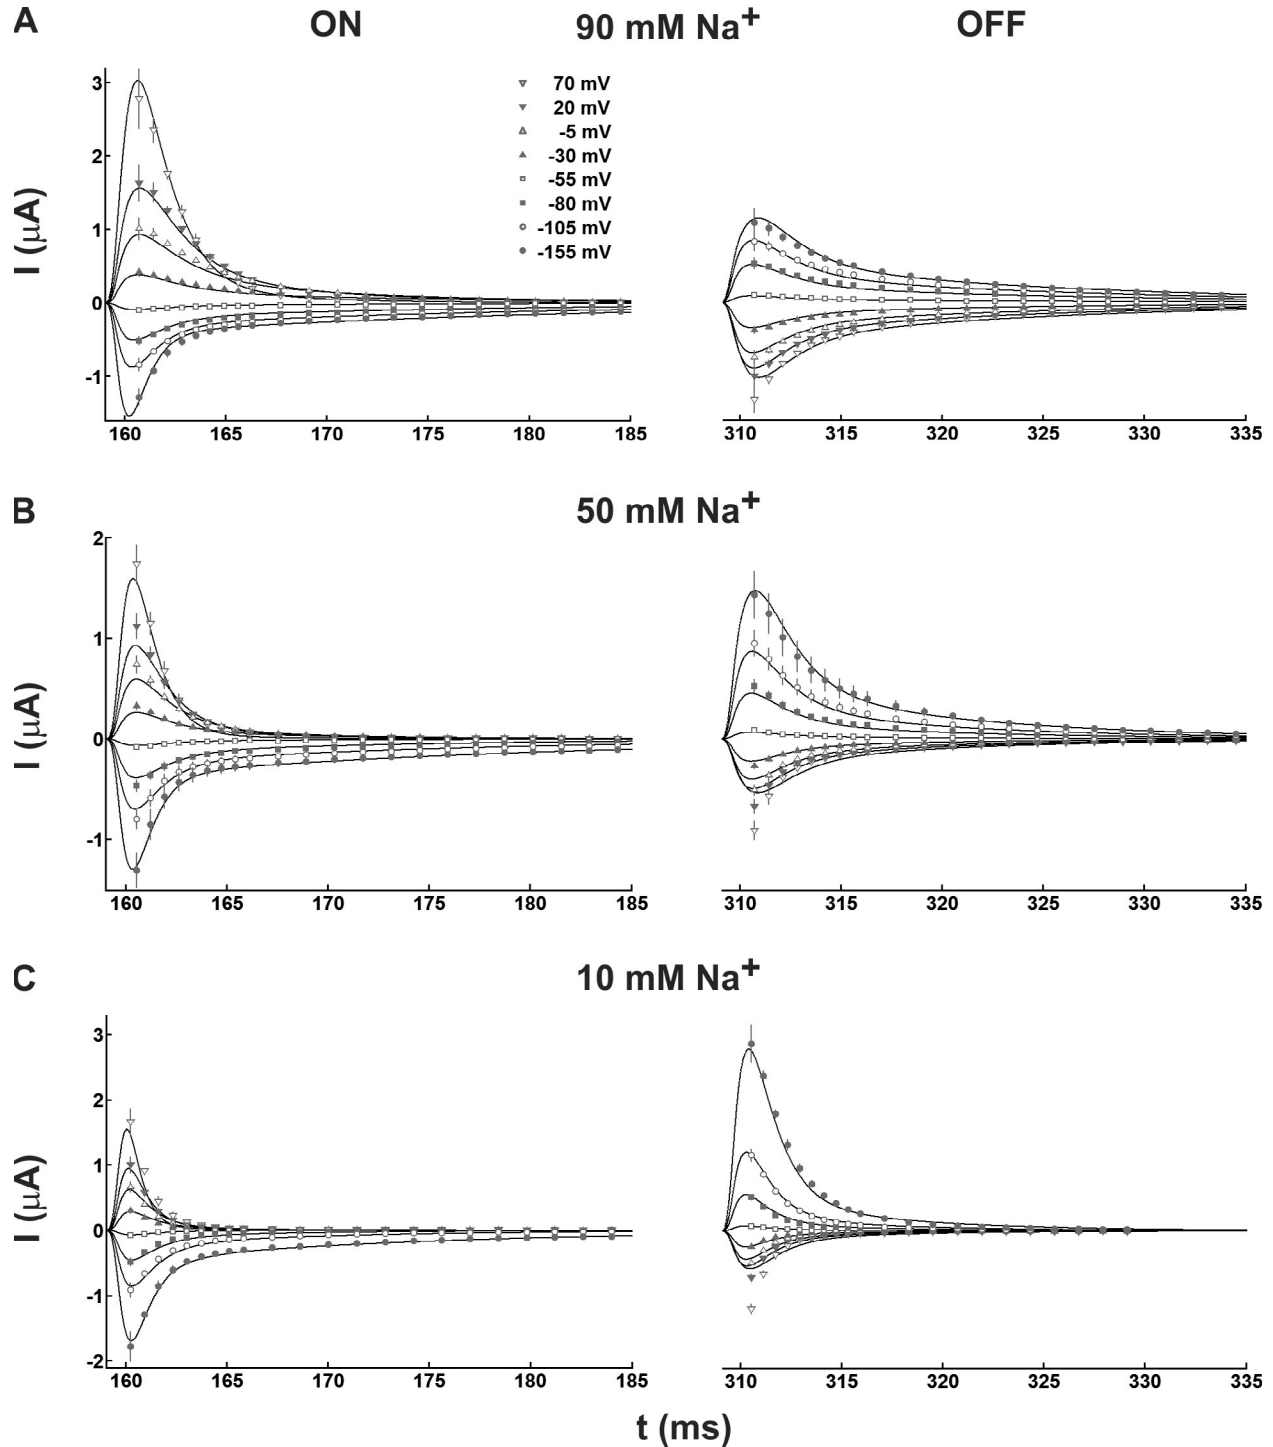

**Figure S1.** The simulated transient currents resulting from a four-state model (see Fig. S2), where the transition  $C_3 \rightarrow C_4$  represents the cooperative binding of two  $\text{Na}^+$  ions are compared with experimental data for (A) 90 mM, (B) 50 mM, and (C) 10 mM  $[\text{Na}^+]_o$ . Please note the systematic discrepancies between the simulated and the experimental OFF currents when the membrane potential is going from +20 and +70 mV to -50 mV.

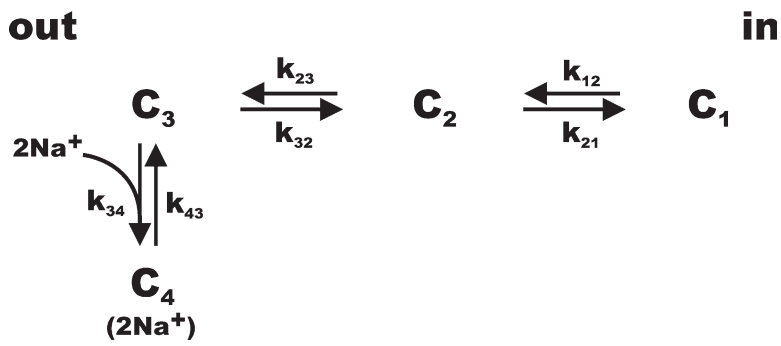

**Figure S2.** Four-state model featuring a cooperative binding of two  $Na^+$  ions in the transition  $C_3 \rightarrow C_4$ .

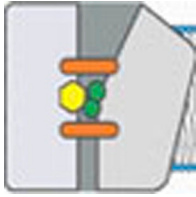

**Video 1.** The video depicts the cotransport mechanism of SGLT1 in the presence of  $0.5 \text{ mM } \alpha\text{MG}$  ( $\sim K_m^{\alpha\text{MG}}$ ),  $90 \text{ mM } [Na^+]_o$ , and a membrane potential of  $-50 \text{ mV}$ . The cartoon represents a true simulation of  $210 \text{ ms}$  made with the seven-state model and the parameters given in Table 1. Each transition from one state to the other is depicted as a continuous displacement arbitrarily set to last  $2 \text{ ms}$ , which is the resolution limit of our experimental results. The steps corresponding to intracellular  $Na^+$  and glucose release are depicted with a hatched cotransporter contour to signify that they have been lumped in a single step in this zero-trans model.
